SUMMER 2016 | VOLUME 14 | NUMBER 3

# Focus

The Journal of Lifelong Learning in Psychiatry

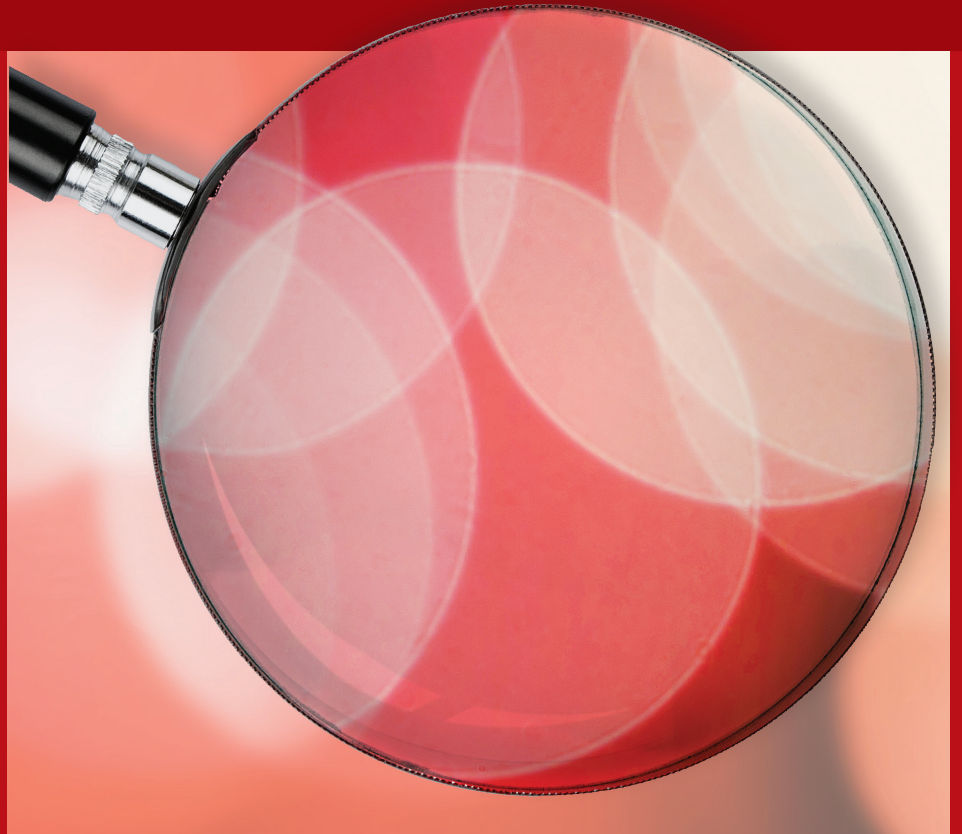

## Schizophrenia: Advances in Understanding and Treatment

Guest Editor: John Lauriello, M.D.

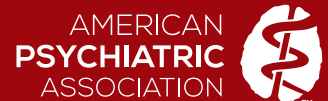

[focus.psychiatryonline.org](http://focus.psychiatryonline.org)
