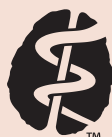

**American Psychiatric Association  
Publishing**

*Editorial Director, Journals*

Michael D. Roy

*Production Manager, Journals*

Wendy Lieberman Taylor

*Publisher*

Rebecca D. Rinehart

**American Psychiatric Association  
Department of Continuing  
Medical Education**

*Associate Director, Focus*

Kristen Moeller

*Editorial Services Manager*

Miriam Epstein

*Editorial Manager, CME and MOC*

*Examinations and Books*

Ann Thomas

*Focus*, a journal of the American Psychiatric Association published by American Psychiatric Association Publishing

ISSN 1541-4094. Printed in the United States.

Published quarterly. Periodicals postage paid at Arlington, VA, and additional mailing offices. POSTMASTER: Send address changes to *Focus*, Circulation Department, American Psychiatric Association Publishing, 1000 Wilson Blvd., Suite 1825, Arlington, VA 22209-3901.

**Subscriptions**

U.S. APA member \$394, U.S. non-member \$616. For additional subscription options, including international and student rates, contact Customer Service at (703) 907-7300 or (800) 368-5777.

**Officers of the Association**

Maria A. Oquendo, M.D., President

Anita S. Everett, M.D., President-Elect

Altha J. Stewart, M.D., Secretary

Saul Levin, M.D., M.P.A., CEO and Medical Director

**Editorial Offices**

Telephone: (703) 907-8637

Fax: (703) 907-7849

Journal Web site: [focus.psychiatryonline.org](http://focus.psychiatryonline.org)

*Focus* CME: [psychiatryonline.org/cme](http://psychiatryonline.org/cme)

**Change of Address and Assistance  
With Subscriptions**

Contact Customer Service at (703) 907-7322 or (800) 368-5777 or e-mail [appi@psych.org](mailto:appi@psych.org).

**CME**

Telephone: (703) 907-8637, Fax: (703) 907-7849, Email: [educme@psych.org](mailto:educme@psych.org)

**Online Access**

Call (800) 368-5777 or e-mail [appi@psych.org](mailto:appi@psych.org) for assistance with online access to *Focus* and CME activities.

Copyright © 2016, American Psychiatric Association

# Focus

The Journal of Lifelong Learning in Psychiatry

## Editorial Board

### Editor

Mark Hyman Rapaport, M.D.  
*Atlanta, Georgia*

### Patient Management Exercise

Ian A. Cook, M.D.  
*Los Angeles, California*

B. Harrison Levine, M.D., M.P.H.  
*Denver, Colorado*

### Ethics Commentary

Laura B. Dunn, M.D.  
*Palo Alto, California*

Laura Weiss Roberts, M.D.  
*Palo Alto, California*

### Communication Commentary

Dorothy E. Stubbe, M.D.  
*New Haven, Connecticut*

### Safety Commentary

Yad M. Jabbarpour, M.D.  
*Catawba, Virginia*

### Senior Advisory Board

Carol A. Bernstein, M.D.  
*New York, New York*

Kathleen T. Brady, M.D., Ph.D.  
*Charleston, South Carolina*

Peter F. Buckley, M.D.  
*Augusta, Georgia*

Pedro L. Delgado, M.D.  
*Little Rock, Arkansas*

Glen O. Gabbard, M.D.  
*Houston, Texas*

Ira M. Lesser, M.D.  
*Torrance, California*

Charles F. Reynolds III, M.D.  
*Pittsburgh, Pennsylvania*

Pedro Ruiz, M.D.  
*Houston, Texas*

Stephen C. Scheiber, M.D.  
*Glenview, Illinois*

Daniel K. Winstead, M.D.  
*New Orleans, Louisiana*

Joel Yager, M.D.  
*Denver, Colorado*

### Editorial Board

Joseph A. Cheong, M.D.  
*Nashville, Tennessee*

Richard Balon, M.D.  
*Rochester Hills, Michigan*

Donald M. Hilty, M.D.  
*Sacramento, California*

Avram H. Mack, M.D.  
*Philadelphia, Pennsylvania*

Vishal Madaan, M.D.  
*Charlottesville, Virginia*

Gail H. Manos, M.D.  
*Portsmouth, Virginia*

Cheryl F. McCartney, M.D.  
*Chapel Hill, North Carolina*

Philip R. Muskin, M.D.  
*New York, New York*

Michele T. Pato, M.D.  
*Brooklyn, New York*

Victor I. Reus, M.D.  
*San Francisco, California*

Cynthia W. Santos, M.D.  
*Houston, Texas*

Deborah Spitz, M.D.  
*Chicago, Illinois*

James W. Thompson, M.D., M.P.H.  
*Palm Beach, Florida*

Joyce A. Tinsley, M.D., M.S.  
*Farmington, Connecticut*

Sidney Zisook, M.D.  
*San Diego, California*

### Associate Editors eFOCUS

David L. Fogelson, M.D.  
*Los Angeles, California*

Robert J. Boland, M.D.  
*Providence, Rhode Island*

### Focus Self-Assessment Editorial Board

Robert J. Boland, M.D.  
*Providence, Rhode Island*

Arden D. Dingle, M.D.  
*Harlingen, Texas*

Laura Fochtman, M.D.  
*Stonybrook, New York*

James W. Jefferson, M.D.  
*Madison, Wisconsin*

Vishal Madaan, M.D.  
*Charlottesville, Virginia*

Annette M. Matthews, M.D.  
*Portland, Oregon*

Lindsay J. Moskowitz, M.D.  
*New Hyde Park, New York*

Shawn Sidhu, M.D.  
*Albuquerque, New Mexico*

Marcia Verduin, M.D.  
*Orlando, Florida*

Randon S. Welton, M.D.  
*Dayton, Ohio*

Eric R. Williams, M.D.  
*Columbia, South Carolina*
